# Supplementary material for: Androgen receptor as a mediator and biomarker of radioresistance in triple-negative breast cancer
Source: PubMed Central journal article supplement (PMC5562815; doi:10.1038/s41523-017-0038-2), 2017-08-18
Supplement: 41523_2017_38_MOESM2_ESM.pdf [file 41523_2017_38_MOESM2_ESM.pdf]

# Phospho DNAPKLS - second gel

AJS08 12.9.2015

1°: 1:1,000  $\alpha$ -DNAPKLS  
2°: 1:5,000  $\alpha$ -mouse

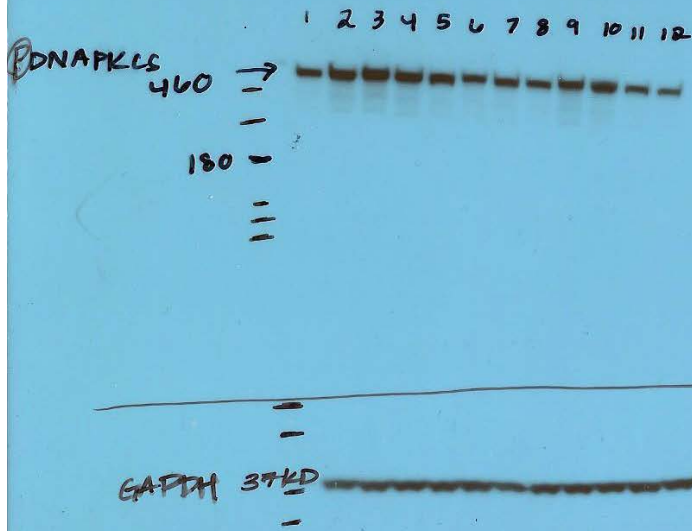

1.  $\Phi$  TX
2. MDV3100
3. 4 Gy 1 min
4. 4 Gy 1 min + MDV
5. 4 Gy 2 min
6. 4 Gy 2 min + MDV
7. 4 Gy 5 min
8. 4 Gy 5 min + MDV
9. 4 Gy 10 min
10. 4 Gy 10 min + MDV
11. 4 Gy 30 min
12. 4 Gy 30 min + MDV

1°: 1:5,000  $\alpha$ -GAPDH  
2°: 1:5,000  $\alpha$ -Rabbit  
30 second exp.

# Total DNAPKLS AJS08

1°: 1:1,000  $\alpha$ -DNAPKLS

2°: 1:5,000  $\alpha$ -mouse  
12-9-15

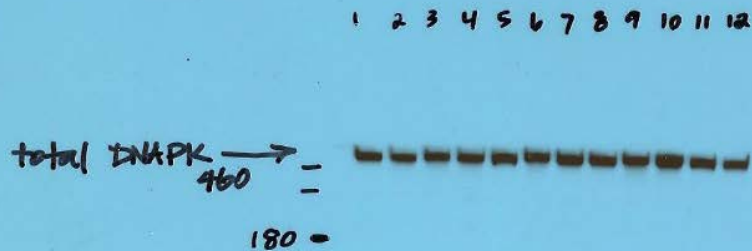

1.  $\Phi$  TX
2. MDV
3. 4 Gy 1
4. 4 Gy 1 + MDV
5. 4 Gy 2
6. 4 Gy 2 + MDV
7. 4 Gy 5 min
8. 4 Gy 5 min + MDV
9. 4 Gy 10 min
10. 4 Gy 10 min + MDV
11. 4 Gy 30 min
12. 4 Gy 30 min + MDV
