# Supplementary material for: Androgen receptor as a mediator and biomarker of radioresistance in triple-negative breast cancer
Source: PubMed Central journal article supplement (PMC5562815; doi:10.1038/s41523-017-0038-2), 2017-08-18
Supplement: 41523_2017_38_MOESM3_ESM.pdf [file 41523_2017_38_MOESM3_ESM.pdf]

11/4/16

2 AR\*

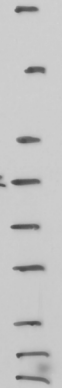

MDA-231  
MDA-453  
SUM-185  
MCF7  
BT 549  
HCC 3B  
HCC 70  
HCC 460  
HCC 1561

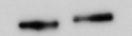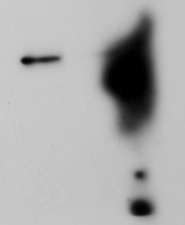

GAPDH

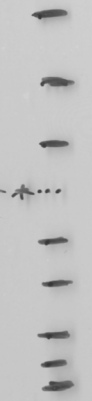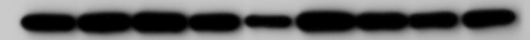

AR blot reprobed

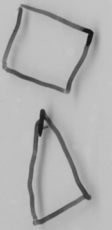

11/7/16
