# Supplementary material for: Androgen receptor as a mediator and biomarker of radioresistance in triple-negative breast cancer
Source: PubMed Central journal article supplement (PMC5562815; doi:10.1038/s41523-017-0038-2), 2017-08-18
Supplement: 41523_2017_38_MOESM7_ESM.pdf [file 41523_2017_38_MOESM7_ESM.pdf]

### Supplementary Figure 3

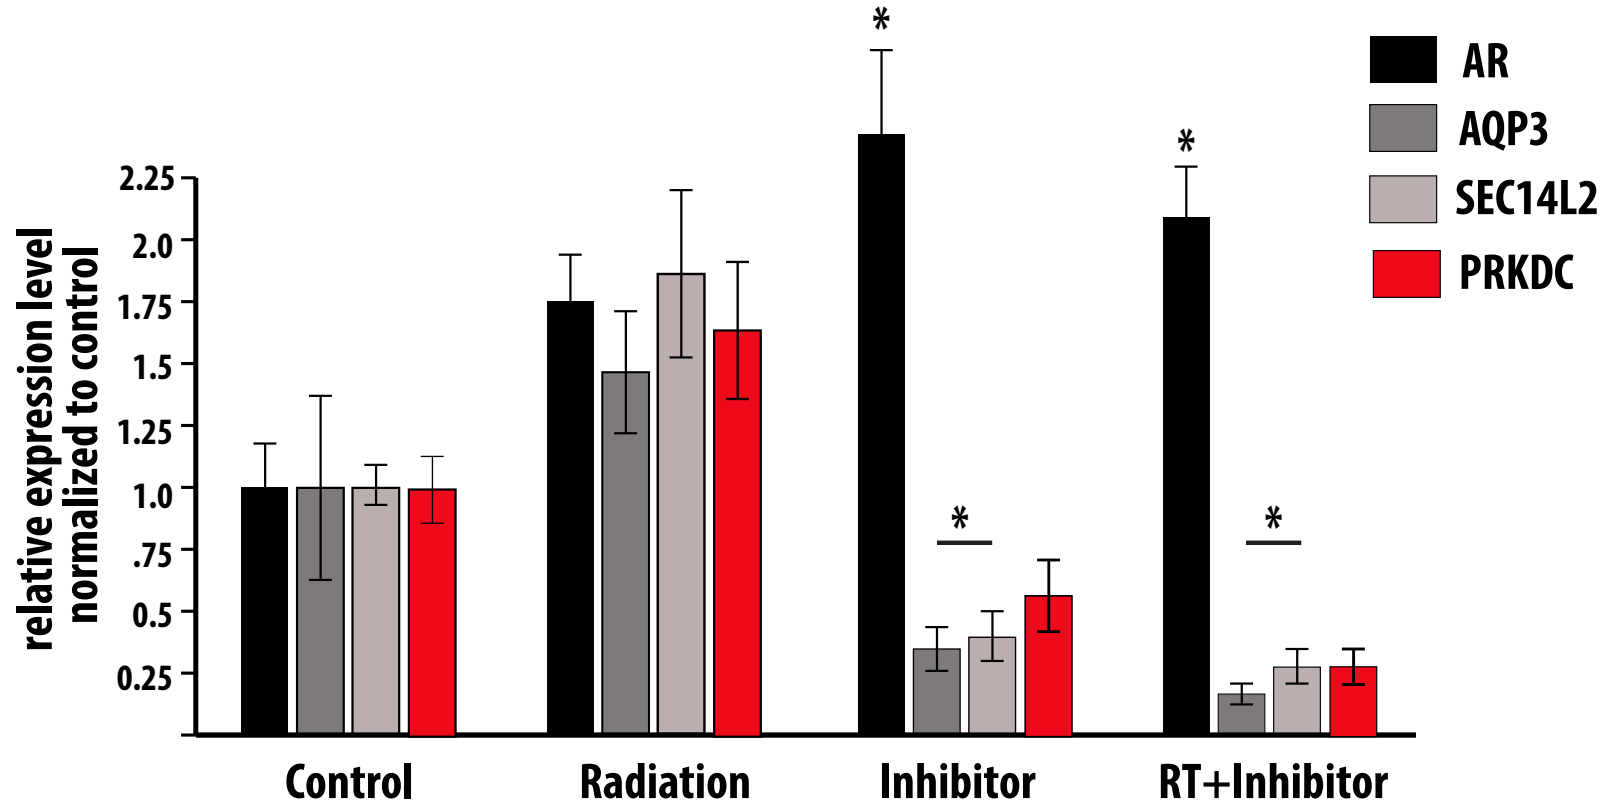

MDA-MB-453 cells  
MDV3100 10 mg/kg/day  
RT: 5 fractions, 2 Gy/day  
4 tumors pooled, 16 tumors per group

\* P-value < 0.05
