# Supplementary material for: Androgen receptor as a mediator and biomarker of radioresistance in triple-negative breast cancer
Source: PubMed Central journal article supplement (PMC5562815; doi:10.1038/s41523-017-0038-2), 2017-08-18

Supplementary Figure 5

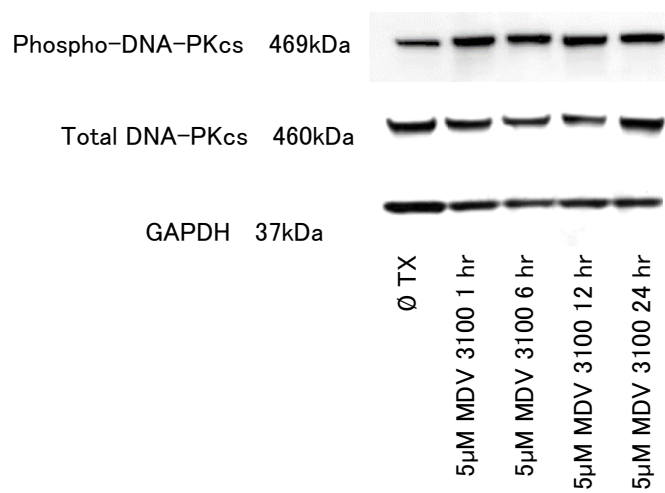

Supplement: 41523_2017_38_MOESM9_ESM.pdf [file 41523_2017_38_MOESM9_ESM.pdf]
