# Supplementary material for: Androgen receptor as a mediator and biomarker of radioresistance in triple-negative breast cancer
Source: PubMed Central journal article supplement (PMC5562815; doi:10.1038/s41523-017-0038-2), 2017-08-18
Supplement: 41523_2017_38_MOESM12_ESM.pdf [file 41523_2017_38_MOESM12_ESM.pdf]

### Supplementary Table 3– Servant dataset

| Characteristic           |                     | N=343 (%) (except when data missing) |
|--------------------------|---------------------|--------------------------------------|
| <i>Age</i>               | ≤40                 | 78 (23%)                             |
|                          | >40                 | 265 (77%)                            |
| <i>Tumor Stage</i>       | T1                  | 216 (63%)                            |
|                          | T2-3                | 125 (37%)                            |
| <i>Nodal Status</i>      | Negative            | 215 (64%)                            |
|                          | Positive            | 128 (36%)                            |
| <i>Recurrence Status</i> | Local recurrence    | 119 (35%)                            |
|                          | No local recurrence | 224 (65%)                            |
| <i>Surgical Margin</i>   | Negative            | 318 (94%)                            |
|                          | Positive            | 22 (6%)                              |
| <i>Boost RT (≥66 Gy)</i> | Yes                 | 247 (73%)                            |
|                          | No                  | 97 (27%)                             |
| <i>Adjuvant CT/HT</i>    | No                  | 201 (59%)                            |
|                          | Yes                 | 141 (41%)                            |
| <i>Adjuvant CT</i>       | No                  | 209 (61%)                            |
|                          | Yes                 | 133 (39%)                            |
| <i>Adjuvant HT</i>       | No                  | 311 (91%)                            |
|                          | Yes                 | 31 (9%)                              |
| <i>Grade</i>             | I/II                | 202 (60%)                            |
|                          | III                 | 137 (40%)                            |
| <i>Mitotic Index</i>     | MI 1                | 174 (53%)                            |
|                          | MI 2                | 59 (18%)                             |
|                          | MI 3                | 96 (29%)                             |
| <i>LVI</i>               | Absent              | 254 (96%)                            |
|                          | Present             | 11 (4%)                              |
| <i>p53 Mutation</i>      | Absent              | 73 (75%)                             |

|                 |          |           |
|-----------------|----------|-----------|
|                 | Present  | 35 (19%)  |
| <b>ER</b>       | Positive | 267 (78%) |
|                 | Negative | 76 (22%)  |
| <b>PR</b>       | Positive | 204 (59%) |
|                 | Negative | 139 (41%) |
| <b>HER2/neu</b> | Positive | 52 (15%)  |
|                 | Negative | 291 (85%) |
| <b>TNBC</b>     | Yes      | 64 (19%)  |
|                 | No       | 279 (81%) |

**Supplementary Table– Clinical characteristics of the tumors in the Servant dataset.** This study from a French (57%) and Dutch (43%) cohort of patients which had clinical follow-up data that allowed for the analysis of the effect of AR expression level on local recurrence. Abbreviations: RT, radiation therapy, CT, chemotherapy; HT, hormone therapy; LR, local recurrence; LVI, lobular vascular in situ; MI, mitotic index; TNBC, triple-negative breast cancer.

### Supplementary Table 3– van de Vijver dataset

| Characteristic           |                     | N=295 (%) (except when data missing) |
|--------------------------|---------------------|--------------------------------------|
| <b>Age</b>               | <40                 | 63 (21%)                             |
|                          | 40-49               | 183 (62%)                            |
|                          | ≥ 50                | 49 (17%)                             |
| <b>Tumor Stage</b>       | T1                  | 155 (53%)                            |
|                          | T2-3                | 140 (47%)                            |
| <b>Nodal Status</b>      | 0 nodes             | 151 (51%)                            |
|                          | 1-3 nodes           | 106 (36%)                            |
|                          | ≥4 nodes            | 38 (13%)                             |
| <b>Recurrence Status</b> | No local recurrence | 268 (91%)                            |
|                          | Local recurrence    | 27 (9%)                              |
| <b>Adjuvant CT</b>       | No                  | 185 (63%)                            |
|                          | Yes                 | 110 (37%)                            |

|                    |          |           |
|--------------------|----------|-----------|
| <i>Adjuvant HT</i> | No       | 255 (96%) |
|                    | Yes      | 40 (14%)  |
| <i>Grade</i>       | I/II     | 176 (60%) |
|                    | III      | 119 (40%) |
| <i>LVI</i>         | Absent   | 185 (63%) |
|                    | Present  | 110 (37%) |
| <i>ER</i>          | Positive | 226 (77%) |
|                    | Negative | 69 (23%)  |

**Supplementary Table– Clinical characteristics of the tumors in the van de Vijver dataset.** This study from a Dutch cohort of patients which had clinical follow-up data that allowed for the analysis of the effect of AR expression on local recurrence. Abbreviations: CT, chemotherapy; HT, hormone therapy; LR, local recurrence; LVI, lymphovascular invasion.
